# Supplementary material for: Structural mobility tunes signalling of the GluA1 AMPA glutamate receptor
Source: PubMed Central journal article supplement (PMC10533411; doi:10.1038/s41586-023-06528-0), 2023-09-13
Supplement: 41586_2023_6528_MOESM2_ESM.pdf [file 41586_2023_6528_MOESM2_ESM.pdf]

## Reporting Summary

Nature Portfolio wishes to improve the reproducibility of the work that we publish. This form provides structure for consistency and transparency in reporting. For further information on Nature Portfolio policies, see our [Editorial Policies](#) and the [Editorial Policy Checklist](#).

### Statistics

For all statistical analyses, confirm that the following items are present in the figure legend, table legend, main text, or Methods section.

n/a Confirmed

- |                                     |                                     |                                                                                                                                                                                                                                                            |
|-------------------------------------|-------------------------------------|------------------------------------------------------------------------------------------------------------------------------------------------------------------------------------------------------------------------------------------------------------|
| <input type="checkbox"/>            | <input checked="" type="checkbox"/> | The exact sample size ( $n$ ) for each experimental group/condition, given as a discrete number and unit of measurement                                                                                                                                    |
| <input type="checkbox"/>            | <input checked="" type="checkbox"/> | A statement on whether measurements were taken from distinct samples or whether the same sample was measured repeatedly                                                                                                                                    |
| <input type="checkbox"/>            | <input checked="" type="checkbox"/> | The statistical test(s) used AND whether they are one- or two-sided<br><i>Only common tests should be described solely by name; describe more complex techniques in the Methods section.</i>                                                               |
| <input checked="" type="checkbox"/> | <input type="checkbox"/>            | A description of all covariates tested                                                                                                                                                                                                                     |
| <input type="checkbox"/>            | <input checked="" type="checkbox"/> | A description of any assumptions or corrections, such as tests of normality and adjustment for multiple comparisons                                                                                                                                        |
| <input type="checkbox"/>            | <input checked="" type="checkbox"/> | A full description of the statistical parameters including central tendency (e.g. means) or other basic estimates (e.g. regression coefficient) AND variation (e.g. standard deviation) or associated estimates of uncertainty (e.g. confidence intervals) |
| <input type="checkbox"/>            | <input checked="" type="checkbox"/> | For null hypothesis testing, the test statistic (e.g. $F$ , $t$ , $r$ ) with confidence intervals, effect sizes, degrees of freedom and $P$ value noted<br><i>Give <math>P</math> values as exact values whenever suitable.</i>                            |
| <input checked="" type="checkbox"/> | <input type="checkbox"/>            | For Bayesian analysis, information on the choice of priors and Markov chain Monte Carlo settings                                                                                                                                                           |
| <input checked="" type="checkbox"/> | <input type="checkbox"/>            | For hierarchical and complex designs, identification of the appropriate level for tests and full reporting of outcomes                                                                                                                                     |
| <input checked="" type="checkbox"/> | <input type="checkbox"/>            | Estimates of effect sizes (e.g. Cohen's $d$ , Pearson's $r$ ), indicating how they were calculated                                                                                                                                                         |

*Our web collection on [statistics for biologists](#) contains articles on many of the points above.*

### Software and code

Policy information about [availability of computer code](#)

Data collection EPU2, pClamp10

Data analysis MotionCor2 v1.3.1, Gctf v1.18\_b1\_sm60\_cu8.0, RELION 4.0, cryoSPARC v4.0.0, coot 0.9, coot 1.0, PHENIX 1.18.2, REFMAC5, Servalcat, UCSF Chimera 1.14, ChimeraX-1.1, Pymol 1.8.2.0, MolProbity v4.2, ProDy 2.3.1, deepEMhancer, Clampfit 10.2, GraphPad Prism

For manuscripts utilizing custom algorithms or software that are central to the research but not yet described in published literature, software must be made available to editors and reviewers. We strongly encourage code deposition in a community repository (e.g. GitHub). See the Nature Portfolio [guidelines for submitting code & software](#) for further information.

### Data

Policy information about [availability of data](#)

All manuscripts must include a [data availability statement](#). This statement should provide the following information, where applicable:

- Accession codes, unique identifiers, or web links for publicly available datasets
- A description of any restrictions on data availability
- For clinical datasets or third party data, please ensure that the statement adheres to our [policy](#)

Cryo-EM model coordinates are deposited in the PDB under the accession codes 8C1Q (resting state GluA1/γ3 LBD-TMD), 8C2I (resting state GluA1/γ3 TMD), 8C1P (active state GluA1/γ3 LBD-TMD), 8C2H (active state GluA1/γ3 TMD), 8P3T (desensitized GluA1/γ3 LBD-TMD conformation 1), 8P3U (desensitized GluA1/γ3 LBD-TMD conformation 2), 8P3V (desensitized GluA1/γ3 LBD-TMD conformation 3), 8P3W (desensitized GluA1/γ3 LBD-TMD conformation 4), 8C1R (resting state

GluA2F231A-Gly743/γ2 LBD-TMD), 8C1S (resting state GluA2F231A-Gly743/γ2 TMD), 8P3X (desensitized GluA2F231A-Gly743/γ2 LBD-TMD conformation 1), 8P3Y (desensitized GluA2F231A-Gly743/γ2 LBD-TMD conformation 2), 8P3Z (desensitized GluA2F231A-Gly743/γ2 LBD-TMD conformation 3), 8P40 (desensitized GluA2F231A-Gly743/γ2 LBD-TMD conformation 1), 8P3S (desensitized GluA2F231A-Arg743/γ2 LBD-TMD conformation 2), and 8P3Q (desensitized GluA2F231A-Gly743/γ2 LBD-TMD conformation 3).

The corresponding EM maps are deposited in the EMDB under accession codes: EMD-16380, EMD-16391, EMD-16379, EMD-16390, EMD-17394, EMD-17395, EMD-17396, EMD-17397, EMD-16381, EMD-16382, EMD-16396, EMD-16399, EMD-17398, EMD-17399, EMD-17400, EMD-17401, EMD-17393, EMD-17392.

Source data for all electrophysiology experiments is also provided in a spreadsheet.

## Research involving human participants, their data, or biological material

Policy information about studies with [human participants or human data](#). See also policy information about [sex, gender \(identity/presentation\), and sexual orientation](#) and [race, ethnicity and racism](#).

|                                                                    |     |
|--------------------------------------------------------------------|-----|
| Reporting on sex and gender                                        | N/A |
| Reporting on race, ethnicity, or other socially relevant groupings | N/A |
| Population characteristics                                         | N/A |
| Recruitment                                                        | N/A |
| Ethics oversight                                                   | N/A |

Note that full information on the approval of the study protocol must also be provided in the manuscript.

## Field-specific reporting

Please select the one below that is the best fit for your research. If you are not sure, read the appropriate sections before making your selection.

Life sciences     Behavioural & social sciences     Ecological, evolutionary & environmental sciences

For a reference copy of the document with all sections, see [nature.com/documents/nr-reporting-summary-flat.pdf](https://www.nature.com/documents/nr-reporting-summary-flat.pdf)

## Life sciences study design

All studies must disclose on these points even when the disclosure is negative.

|                 |                                                                                                                                                                                                                                                                                                                                                                                                                                                                                                                                                                                                                                                                                                                                                                     |
|-----------------|---------------------------------------------------------------------------------------------------------------------------------------------------------------------------------------------------------------------------------------------------------------------------------------------------------------------------------------------------------------------------------------------------------------------------------------------------------------------------------------------------------------------------------------------------------------------------------------------------------------------------------------------------------------------------------------------------------------------------------------------------------------------|
| Sample size     | No statistical method was used to determine sample size. Cryo-EM sample sizes were determined by available electron microscopy time and the number of particles on electron microscopy grids. The sample size is sufficient to obtain a structure at the reported resolution, as assessed by Fourier shell correlation. Electrophysiology sample sizes were determined based on literature review, previous experience with data of this sort, and reproducibility of results across independent experiments. The authors have extensive previous experience with data of this type (Zhang, Nature 2021; Herguedas, Science 2019; Herguedas, Science 2016; Cais, Cell Reports 2014), therefore sample sizes were based on an understanding of sample variabilities. |
| Data exclusions | During cryo-EM data processing, data were excluded using standard classification approaches in cryoSPARC and RELION to remove false picks and particle images without high resolution content. In electrophysiology experiments, data were excluded based on pre-established quality control criteria (rise time, holding current, and, for heteromeric receptor recordings, rectification index > 0.5).                                                                                                                                                                                                                                                                                                                                                            |
| Replication     | All cryo-EM structures were determined from independent half datasets, which were compared to assess the resolution of the reconstruction. There is no need to replicate cryo-EM experiments and no replication was performed. All electrophysiology data sets were pooled from at least two independent experiments and all results were successfully replicated.                                                                                                                                                                                                                                                                                                                                                                                                  |
| Randomization   | For cryo-EM, division of datasets into two random halves was done based on standard approach in RELION. Randomisation is not relevant in electrophysiology as recordings are made sequentially.                                                                                                                                                                                                                                                                                                                                                                                                                                                                                                                                                                     |
| Blinding        | Blinding was not applicable to cryo-EM or MD simulations, because this type of study does not use group allocation. Researchers were not blinded for the acquisition or analysis of electrophysiology data as it is not technically or practically feasible to do so. Experimenter independence was ensured by application of defined exclusion criteria as stated above.                                                                                                                                                                                                                                                                                                                                                                                           |

## Reporting for specific materials, systems and methods

We require information from authors about some types of materials, experimental systems and methods used in many studies. Here, indicate whether each material, system or method listed is relevant to your study. If you are not sure if a list item applies to your research, read the appropriate section before selecting a response.

## Materials &amp; experimental systems

|                                     |                                                                 |
|-------------------------------------|-----------------------------------------------------------------|
| n/a                                 | Included in the study                                           |
| <input checked="" type="checkbox"/> | <input type="checkbox"/> Antibodies                             |
| <input type="checkbox"/>            | <input checked="" type="checkbox"/> Eukaryotic cell lines       |
| <input checked="" type="checkbox"/> | <input type="checkbox"/> Palaeontology and archaeology          |
| <input type="checkbox"/>            | <input checked="" type="checkbox"/> Animals and other organisms |
| <input checked="" type="checkbox"/> | <input type="checkbox"/> Clinical data                          |
| <input checked="" type="checkbox"/> | <input type="checkbox"/> Dual use research of concern           |
| <input checked="" type="checkbox"/> | <input type="checkbox"/> Plants                                 |

## Methods

|                                     |                                                 |
|-------------------------------------|-------------------------------------------------|
| n/a                                 | Included in the study                           |
| <input checked="" type="checkbox"/> | <input type="checkbox"/> ChIP-seq               |
| <input checked="" type="checkbox"/> | <input type="checkbox"/> Flow cytometry         |
| <input checked="" type="checkbox"/> | <input type="checkbox"/> MRI-based neuroimaging |

## Eukaryotic cell lines

Policy information about [cell lines and Sex and Gender in Research](#)

|                                                                   |                                                                                                                                                                                                           |
|-------------------------------------------------------------------|-----------------------------------------------------------------------------------------------------------------------------------------------------------------------------------------------------------|
| Cell line source(s)                                               | HEK293T cells were purchased from ATCC and KEK-Expi293F cells from ThermoFisher Scientific (CatNo. A14527).                                                                                               |
| Authentication                                                    | No further authentication was performed for cell lines used in this study.                                                                                                                                |
| Mycoplasma contamination                                          | No mycoplasma testing was performed specifically for this study, the HEK293T cell line had tested negative in the past.                                                                                   |
| Commonly misidentified lines (See <a href="#">ICLAC</a> register) | HEK cells are listed in the register; however, our HEK cell lines come from reliable source and are the only secondary cell type used in this study, which minimises the risk of any cross-contamination. |

## Animals and other research organisms

Policy information about [studies involving animals; ARRIVE guidelines](#) recommended for reporting animal research, and [Sex and Gender in Research](#)

|                         |                                                                                                                                                                                                                                                                                                      |
|-------------------------|------------------------------------------------------------------------------------------------------------------------------------------------------------------------------------------------------------------------------------------------------------------------------------------------------|
| Laboratory animals      | C57/Bl6 mice of both sexes were used in this study at age postnatal day 6-8. Animals were housed with unlimited access to food and water under a 12 hour light-dark cycle, at normal room temperature (20-22C). Pregnant mothers were monitored daily, and P0 refers to the day of litter discovery. |
| Wild animals            | No wild animals were used in this study.                                                                                                                                                                                                                                                             |
| Reporting on sex        | Organotypic slices were prepared from pups of both sexes. There is no reported or discernible difference between sexes in electrophysiological properties of slices prepared at age P6-8.                                                                                                            |
| Field-collected samples | No field collected samples were used in this study.                                                                                                                                                                                                                                                  |
| Ethics oversight        | All procedures were carried out under PPL 70/8135 in accordance with UK Home Office regulations. Experiments conducted in the UK are licensed under the UK Animals (Scientific Procedures) Act of 1986 following local ethical approval.                                                             |

Note that full information on the approval of the study protocol must also be provided in the manuscript.
